# Supplementary material for: Computational study on the mechanism for the synthesis of active pharmaceutical ingredients nitrofurantoin and dantrolene in both solution and mechanochemical conditions
Source: Royal Society of Chemistry journal article supplement (doi:10.1039/d4cp01613k), 2024-01-01
Supplement: d4cp01613k1.pdf [file d4cp01613k1.pdf]

## *Electronic Supplementary Information*

### **Computational study on the mechanism for the synthesis of the active pharmaceutical ingredients nitrofurantoin and dantrolene in both solution and mechanochemical conditions**

Dayana M. Galeas,<sup>1</sup> Iogann Tolbatov,<sup>1</sup> Evelina Colacino,<sup>2</sup> Feliu Maseras<sup>1,\*</sup>

<sup>1</sup> Institute of Chemical Research of Catalonia (ICIQ-CERCA), The Barcelona Institute of Science and Technology, Avda. Països Catalans, 16, 43007 Tarragona, Spain

<sup>2</sup> ICGM, Univ Montpellier, CNRS, ENSCM, Montpellier, France

#### **Table of Contents**

|                                                                                |   |
|--------------------------------------------------------------------------------|---|
| <b>S1. Calculation of dielectric constant in ball-milling conditions</b> ..... | 2 |
| <b>S2. Starting concentrations</b> .....                                       | 3 |
| <b>S3. Benchmarking of the DFT functionals</b> .....                           | 4 |
| <b>S4. References</b> .....                                                    | 5 |
| <b>S4. Cartesian coordinates, energies and low frequencies</b> .....           | 6 |

## S1. Calculation of dielectric constant in ball-milling conditions

The solution of the wave equation for the electromagnetic wave in a dielectric medium yields a speed of propagation  $v = \frac{1}{\sqrt{\epsilon_0 \mu_0 \epsilon \mu}}$ . The speed of light in vacuum is  $c = \frac{1}{\sqrt{\epsilon_0 \mu_0}}$ . Refractive index  $n = \frac{c}{v} = \sqrt{\epsilon \mu}$ . Most materials with light in the optical range are characterized by  $\mu \approx 1$ . Thus,  $\epsilon = n^2$  [1].

The aldehyde and amine hydrochloride were mixed in a 1:1 proportion, the resulting dielectric constant was computed using the formula  $\epsilon_M = \sum_n \varphi_n \epsilon_n$ , where  $\epsilon_M$ ,  $\varphi_n$ , and  $\epsilon_n$  stand for dielectric constant of mixture, molar fraction of each component, and dielectric constant of individual component, respectively [2].

Nitrofurantoin in ball-milling conditions: The refractive indices of 1-amino-hydantoin, hydrochloric acid, and 5-nitro-2-furaldehyde are 1.556 [3], 1.254 [4] and 1.579 [5]. Based on the molar masses, we have calculated the molar fractions of 1-amino-hydantoin hydrochloric acid, and 5-nitro-2-furaldehyde to be 0.393, 0.125, and 0.482, respectively. Based on these data, the dielectric constant of the mixture  $\epsilon_M$  is 2.350.

Dantrolene in ball-milling conditions: The refractive indices of 1-amino-hydantoin, hydrochloric acid, and of 5-(4-nitrophenyl)-2-furaldehyde are 1.556 [3], 1.254 [4] and 1.618 [6]. Based on the molar masses, we have calculated the molar fractions of 1-amino-hydantoin, hydrochloric acid, and 5-(4-nitrophenyl)-2-furaldehyde to be 0.312, 0.099, and 0.589, respectively. Based on these data, the dielectric constant of the mixture  $\epsilon_M$  is 2.453.

## S2. Starting concentrations

Synthesis of nitrofurantoin in solvent. Based on the procedure described in [7], concentrations of acetic acid, 1-amino-hydantoin, and 5-nitro-2-furaldehyde are 0.35 M, 0.2 M, and 0.2 M, respectively.

Synthesis of nitrofurantoin in ball-milling conditions: We follow the published experimental data [8] and convert them to concentrations. The density of 1-amino-hydantoin is 1.50 g/cm<sup>3</sup>, the molecular weight of 1-amino-hydantoin (A) is 151.55 g/mol [3]. (The data on density of 1-amino-hydantoin hydrochloride is unavailable, that is why the employed density value is taken for 1-amino-hydantoin) The density and molecular weight of 5-nitro-2-furaldehyde (B) are 1.47 g/cm<sup>3</sup> and 141.08 g/mol [5]. Since the initial ratio of reactants is 1:1, and assuming volumes of the mixture components A and B are exactly additive, we obtain:

$$\rho_{AB} = \frac{m_A + m_B}{V_A + V_B} = \frac{n_A M_A + n_B M_B}{\frac{n_A M_A}{\rho_A} + \frac{n_B M_B}{\rho_B}}$$

Taking into account that the number of moles for A and B is the same,

$$\rho_{AB} = \frac{M_A + M_B}{\frac{M_A}{\rho_A} + \frac{M_B}{\rho_B}} = 1.485 \frac{g}{cm^3}$$

Thus, concentrations equal  $C_A = C_B = \frac{n_A}{V_{AB}} = \frac{n_A}{\frac{m_A + m_B}{\rho_{AB}}} = \rho_{AB} \frac{1}{M_A + M_B} = 5.074 \text{ M}$ .

Synthesis of dantrolene in ball-milling conditions: We follow the published experimental data [8] and convert them to concentrations. Taking into account the density of 5-(4-nitrophenyl)-2-furaldehyde being 1.348 g/cm<sup>3</sup> [5] and molecular weight 217.18 g/mol, the concentrations of 1-amino-hydantoin hydrochloride (A) and 5-(4-nitrophenyl)-2-furaldehyde are 3.816 M.

### S3. Benchmarking of the DFT functionals

The performance with another functional was evaluated. Transition state **TS2** (the highest, rate-determining barrier in solvent conditions) and product formation energies were calculated for nitrofurantoin in solvent conditions.

Table S1. Benchmarking of the DFT functionals via the calculation of the Gibbs free energy of the highest barrier (TS2) and reaction Gibbs free energy for the reaction of synthesis of nitrofurantoin in solution. (Reaction profile for this reaction is presented at Figure 1 of the article.) The energies are calculated with B3LYP-D3BJ/cc-pVTZ//B3LYP-D3BJ/cc-pVTZ. The effect of the dielectric environment (water) was introduced through implicit solvation *via* the PCM approach.

| Method          | Transition state TS2 (kcal/mol) | Products (kcal/mol) |
|-----------------|---------------------------------|---------------------|
| B3LYP-GD3       | 22.2                            | -4.5                |
| B3LYP-GD3BJ     | 21.4                            | -5.3                |
| $\omega$ B97X-D | 24.5                            | -3.2                |

## S4. References

- [1] P. O. Robitaille, H. Abou-Rachid and J. Brisson, *Defense Technology*, 2021, **17**, 1988-1994.
- [2] B. S. Pladevall, A. de Aguirre, and F. Maseras, F., *ChemSusChem*, 2021, **14**, 2763-2768.
- [3] <https://www.chemspider.com/Chemical-Structure.65659.html> (accessed on April 15, 2024); [https://www.chemsrc.com/en/cas/2827-56-7\\_330251.html](https://www.chemsrc.com/en/cas/2827-56-7_330251.html) (accessed on April 15, 2024)
- [4] <https://pubchem.ncbi.nlm.nih.gov/compound/Hydrochloric-Acid> (accessed on April 15, 2024)
- [5] <https://www.chembk.com/en/chem/698-63-5> (accessed on April 15, 2024)
- [6] [https://www.chembk.com/en/chem/5-\(4-nitrophenyl\)furan-2-carbaldehyde](https://www.chembk.com/en/chem/5-(4-nitrophenyl)furan-2-carbaldehyde) (accessed on April 15, 2024)
- [7] C. Gallardo-Garrido, Y. Cho, J. Cortés-Ríos, D. Vasquez, C. D. Pessoa-Mahana, R. Araya-Maturana, H. Pessoa-Mahana, M. Faundez, *Tox. Appl. Pharm.*, 2020, **401**, 115104.
- [8] E. Colacino, A. Porcheddu, I. Halasz, C. Charnay, F. Delogu, R. Guerra and J. Fullenwarth, *Green Chemistry*, 2018, **20**, 2973-2977

#### S4. Cartesian coordinates, energies and low frequencies

NF-BM-Comp

Energy (POTENTIAL) = -1786.21073709 Eh

Gibbs energy= -1786.040523 Eh

Three lowest frequencies (cm<sup>-1</sup>): 15.2765, 27.2072, 29.0340

|    | Atom | X       | Y       | Z       |
|----|------|---------|---------|---------|
| 1  | H    | 1.7885  | -1.0062 | 1.3365  |
| 2  | Cl   | 3.4639  | 0.0230  | 1.1299  |
| 3  | C    | -1.4120 | -1.0319 | 0.9986  |
| 4  | C    | -1.4619 | 0.2235  | -0.9439 |
| 5  | C    | 0.0009  | -0.0677 | -0.6264 |
| 6  | H    | 0.4049  | -0.7674 | -1.3618 |
| 7  | H    | 0.5936  | 0.8434  | -0.6114 |
| 8  | N    | -2.1979 | -0.3886 | 0.0581  |
| 9  | H    | -3.2053 | -0.3910 | 0.0981  |
| 10 | O    | -1.8973 | 0.8489  | -1.8720 |
| 11 | O    | -1.7503 | -1.7460 | 1.9108  |
| 12 | N    | -0.1049 | -0.6775 | 0.6945  |
| 13 | N    | 0.8986  | -1.5584 | 1.1604  |
| 14 | H    | 0.5430  | -1.9869 | 2.0184  |
| 15 | H    | 1.1157  | -2.3024 | 0.4281  |
| 16 | C    | 6.4538  | -2.2419 | -1.0844 |
| 17 | C    | 6.5042  | -3.4980 | 0.8577  |
| 18 | C    | 5.0414  | -3.2060 | 0.5411  |
| 19 | H    | 4.4483  | -4.1169 | 0.5261  |
| 20 | H    | 4.6380  | -2.5065 | 1.2770  |
| 21 | N    | 7.2399  | -2.8859 | -0.1445 |
| 22 | H    | 8.2473  | -2.8839 | -0.1852 |
| 23 | O    | 6.9399  | -4.1240 | 1.7853  |
| 24 | O    | 6.7918  | -1.5275 | -1.9965 |
| 25 | N    | 5.1467  | -2.5958 | -0.7797 |
| 26 | N    | 4.1434  | -1.7142 | -1.2446 |
| 27 | H    | 3.9270  | -0.9704 | -0.5118 |
| 28 | H    | 4.4989  | -1.2853 | -2.1026 |
| 29 | Cl   | 1.5782  | -3.2961 | -1.2139 |
| 30 | H    | 3.2532  | -2.2658 | -1.4207 |

NF-BM-RA1

Energy (POTENTIAL) = -893.083212676 Eh

Gibbs energy= -893.011440 Eh

Three lowest frequencies ( $\text{cm}^{-1}$ ): 33.2393, 67.5840, 139.3011

|    | Atom | X       | Y       | Z       |
|----|------|---------|---------|---------|
| 1  | C    | -0.9733 | -1.1961 | -0.1875 |
| 2  | C    | -1.7174 | 0.9850  | -0.0057 |
| 3  | C    | -0.4295 | 0.8715  | 0.8008  |
| 4  | H    | 0.3738  | 1.4305  | 0.3160  |
| 5  | H    | -0.5751 | 1.2413  | 1.8135  |
| 6  | N    | -1.9394 | -0.2723 | -0.5442 |
| 7  | H    | -2.7009 | -0.4951 | -1.1658 |
| 8  | O    | -2.4056 | 1.9581  | -0.1528 |
| 9  | O    | -0.8103 | -2.3193 | -0.6023 |
| 10 | N    | -0.1839 | -0.5700 | 0.7668  |
| 11 | N    | 1.1270  | -1.0874 | 0.8991  |
| 12 | H    | 1.3191  | -1.3024 | 1.8752  |
| 13 | H    | 1.1457  | -1.9614 | 0.3647  |
| 14 | H    | 1.9498  | -0.3171 | 0.4353  |
| 15 | Cl   | 2.9309  | 0.7847  | -0.2411 |

NF-BM-RA2

Energy (POTENTIAL) = -1441.16962704 Eh

Gibbs energy= -1441.028797 Eh

Three lowest frequencies (cm<sup>-1</sup>): 12.1653, 23.3720, 28.3361

|    | Atom | X       | Y       | Z       |
|----|------|---------|---------|---------|
| 1  | C    | -2.7662 | -1.1271 | -0.5916 |
| 2  | C    | -4.9866 | -0.4774 | -0.6564 |
| 3  | C    | -4.4747 | -0.2311 | 0.7559  |
| 4  | H    | -4.3759 | 0.8454  | 0.9173  |
| 5  | H    | -5.1397 | -0.6711 | 1.4952  |
| 6  | N    | -3.9110 | -0.9896 | -1.3578 |
| 7  | H    | -3.9285 | -1.2034 | -2.3430 |
| 8  | O    | -6.0904 | -0.2696 | -1.0823 |
| 9  | O    | -1.6557 | -1.4160 | -0.9569 |
| 10 | N    | -3.1650 | -0.8857 | 0.7270  |
| 11 | N    | -2.1509 | -0.3776 | 1.5792  |
| 12 | H    | -2.3470 | -0.6451 | 2.5412  |
| 13 | H    | -1.2100 | -0.7550 | 1.3108  |
| 14 | H    | -2.0855 | 0.7202  | 1.4317  |
| 15 | Cl   | -2.0558 | 2.3597  | 0.6717  |
| 16 | O    | 3.1984  | -0.3541 | 0.3148  |
| 17 | C    | 4.3032  | 0.1183  | -0.2752 |
| 18 | C    | 4.0509  | 1.1819  | -1.0917 |
| 19 | H    | 4.7740  | 1.7278  | -1.6685 |
| 20 | C    | 2.1753  | 0.4313  | -0.1338 |
| 21 | C    | 2.6547  | 1.3851  | -0.9974 |
| 22 | H    | 2.0661  | 2.1369  | -1.4938 |
| 23 | C    | 0.8282  | 0.1782  | 0.3235  |
| 24 | H    | 0.0726  | 0.8591  | -0.0925 |
| 25 | O    | 0.5333  | -0.7017 | 1.1180  |
| 26 | N    | 5.5443  | -0.5402 | 0.0273  |
| 27 | O    | 5.5174  | -1.4848 | 0.7981  |
| 28 | O    | 6.5376  | -0.0855 | -0.5260 |



NF-BM-INT

Energy (POTENTIAL) = -1441.17150675 Eh

Gibbs energy= -1441.029809 Eh

Three lowest frequencies ( $\text{cm}^{-1}$ ): 18.4424, 21.8952, 32.9804

|    | Atom | X       | Y       | Z       |
|----|------|---------|---------|---------|
| 1  | C    | 0.6085  | -1.1522 | 1.1111  |
| 2  | H    | 0.3728  | -0.2737 | 1.7222  |
| 3  | O    | 0.5319  | -2.3452 | 1.8474  |
| 4  | H    | -0.4117 | -2.5141 | 2.0227  |
| 5  | C    | -2.2171 | 0.4355  | -0.4277 |
| 6  | C    | -2.4622 | -1.3405 | 1.0812  |
| 7  | C    | -3.6323 | 0.4016  | 0.1205  |
| 8  | H    | -2.2214 | 0.2993  | -1.5098 |
| 9  | H    | -1.7358 | 1.3872  | -0.2021 |
| 10 | N    | -1.5940 | -0.6795 | 0.2644  |
| 11 | O    | -2.2512 | -2.3117 | 1.7806  |
| 12 | O    | -4.5513 | 1.1554  | -0.1332 |
| 13 | N    | -3.6829 | -0.6596 | 0.9782  |
| 14 | H    | -4.4968 | -0.9235 | 1.5123  |
| 15 | N    | -0.3012 | -1.0861 | -0.0326 |
| 16 | H    | -0.3052 | -1.9642 | -0.5430 |
| 17 | H    | -4.1887 | 2.3795  | -1.2896 |
| 18 | Cl   | -3.7589 | 3.2434  | -2.1915 |
| 19 | O    | 2.3796  | 0.1347  | 0.0620  |
| 20 | C    | 3.6715  | -0.0091 | -0.3107 |
| 21 | C    | 4.1458  | -1.2490 | -0.0101 |
| 22 | H    | 5.1386  | -1.6117 | -0.2024 |
| 23 | C    | 2.0146  | -1.0494 | 0.6173  |
| 24 | C    | 3.0572  | -1.9282 | 0.6002  |
| 25 | H    | 3.0385  | -2.9303 | 0.9867  |
| 26 | N    | 4.3034  | 1.1074  | -0.9267 |
| 27 | O    | 5.4756  | 0.9540  | -1.2595 |
| 28 | O    | 3.6486  | 2.1300  | -1.0817 |

NF-BM-R1

Energy (POTENTIAL) = -432.226260871 Eh

Gibbs energy= -432.161485 Eh

Three lowest frequencies (cm<sup>-1</sup>): 46.7582, 139.8312, 189.4267

|    | Atom | X       | Y       | Z       |
|----|------|---------|---------|---------|
| 1  | C    | -0.6666 | 0.8014  | -0.0196 |
| 2  | C    | 1.4865  | -0.0687 | 0.0072  |
| 3  | C    | 0.5013  | -1.2319 | 0.0127  |
| 4  | H    | 0.6774  | -1.8837 | -0.8438 |
| 5  | H    | 0.6160  | -1.8188 | 0.9261  |
| 6  | N    | 0.7139  | 1.0674  | -0.0098 |
| 7  | H    | 1.0823  | 2.0050  | -0.0118 |
| 8  | O    | 2.6923  | -0.1269 | 0.0160  |
| 9  | O    | -1.5562 | 1.6220  | 0.0010  |
| 10 | N    | -1.9852 | -1.2496 | 0.0556  |
| 11 | H    | -2.4933 | -0.9101 | 0.8660  |
| 12 | H    | -2.5524 | -1.0574 | -0.7627 |
| 13 | N    | -0.7790 | -0.5587 | -0.0529 |

NF-BM-R3\_P3

Energy (POTENTIAL) = -460.844959324 Eh

Gibbs energy= -460.856168 Eh

Vibrational frequency (cm<sup>-1</sup>): 2931.0305

|   | Atom | X       | Y       | Z       |
|---|------|---------|---------|---------|
| 1 | Cl   | 0.9853  | -0.8681 | 0.2351  |
| 2 | H    | -0.2583 | -0.6479 | -0.0011 |

NF-BM-R2

Energy (POTENTIAL) = -548.068467486 Eh

Gibbs energy= -548.020618 Eh

Three lowest frequencies ( $\text{cm}^{-1}$ ): 62.7818, 134.5460, 137.7671

|    | Atom | X       | Y       | Z      |
|----|------|---------|---------|--------|
| 1  | O    | -0.3553 | -0.4914 | 0.0000 |
| 2  | C    | 0.7544  | 0.2606  | 0.0000 |
| 3  | C    | 0.4805  | 1.5965  | 0.0000 |
| 4  | H    | 1.2004  | 2.3936  | 0.0000 |
| 5  | C    | -1.3997 | 0.3850  | 0.0000 |
| 6  | C    | -0.9324 | 1.6750  | 0.0000 |
| 7  | H    | -1.5370 | 2.5651  | 0.0000 |
| 8  | C    | -2.7623 | -0.1329 | 0.0000 |
| 9  | H    | -3.5271 | 0.6639  | 0.0000 |
| 10 | O    | -3.0518 | -1.3061 | 0.0000 |
| 11 | N    | 2.0157  | -0.4240 | 0.0000 |
| 12 | O    | 2.0054  | -1.6437 | 0.0000 |
| 13 | O    | 3.0113  | 0.2905  | 0.0000 |

NF-BM-P1

Energy (POTENTIAL) = -76.4634843278 Eh

Gibbs energy= -76.459889 Eh

Three lowest frequencies ( $\text{cm}^{-1}$ ): 1635.1854, 3797.0765, 3890.9317

|   | Atom | X      | Y       | Z       |
|---|------|--------|---------|---------|
| 1 | O    | 0.0000 | 0.0000  | 0.1116  |
| 2 | H    | 0.0000 | 0.7596  | -0.4783 |
| 3 | H    | 0.0000 | -0.7596 | -0.4783 |

NF-BM-P2

Energy (POTENTIAL) = -903.841792117 Eh

Gibbs energy= -903.730593 Eh

Three lowest frequencies (cm<sup>-1</sup>): 28.6187, 39.7805, 51.7576

|    | Atom | X        | Y       | Z       |
|----|------|----------|---------|---------|
| 1  | C    | -7.7326  | -0.3076 | -0.3974 |
| 2  | C    | -9.2174  | 0.3678  | 1.2616  |
| 3  | C    | -7.9643  | 1.2179  | 1.3849  |
| 4  | H    | -8.1991  | 2.2734  | 1.2518  |
| 5  | H    | -7.4996  | 1.0799  | 2.3607  |
| 6  | N    | -8.9817  | -0.4820 | 0.2025  |
| 7  | H    | -9.6377  | -1.1733 | -0.1270 |
| 8  | O    | -10.2119 | 0.4182  | 1.9388  |
| 9  | O    | -7.2995  | -0.9307 | -1.3383 |
| 10 | N    | -7.1205  | 0.7147  | 0.3112  |
| 11 | N    | -5.9048  | 1.2687  | 0.1414  |
| 12 | O    | -3.4492  | 2.4821  | -0.0996 |
| 13 | C    | -2.2098  | 2.8504  | -0.4859 |
| 14 | C    | -1.7704  | 2.1217  | -1.5517 |
| 15 | H    | -0.8200  | 2.2255  | -2.0414 |
| 16 | C    | -3.8275  | 1.4815  | -0.9416 |
| 17 | C    | -2.8250  | 1.2289  | -1.8494 |
| 18 | H    | -2.8536  | 0.4897  | -2.6304 |
| 19 | C    | -5.1169  | 0.8668  | -0.7905 |
| 20 | H    | -5.3609  | 0.0777  | -1.4893 |
| 21 | N    | -1.5787  | 3.8964  | 0.2427  |
| 22 | O    | -2.1897  | 4.4038  | 1.1742  |
| 23 | O    | -0.4501  | 4.2125  | -0.1282 |

NF-BM-TS2

Energy (POTENTIAL) = -1441.14870744 Eh

Gibbs energy= -1441.003953 Eh

Three lowest frequencies (cm<sup>-1</sup>): -109.3199, 31.1593, 36.1089

| Atom  | X        | Y       | Z       |
|-------|----------|---------|---------|
| 1 C   | -7.5403  | 0.4353  | 1.4316  |
| 2 C   | -9.4321  | 0.3351  | 0.0936  |
| 3 C   | -8.3942  | 1.1615  | -0.6541 |
| 4 H   | -8.0844  | 0.6149  | -1.5439 |
| 5 H   | -8.7959  | 2.1369  | -0.9230 |
| 6 N   | -8.8406  | -0.0289 | 1.2859  |
| 7 H   | -9.2623  | -0.6536 | 1.9545  |
| 8 O   | -10.5449 | 0.0603  | -0.2710 |
| 9 O   | -6.7629  | 0.1892  | 2.3191  |
| 10 N  | -7.3222  | 1.2578  | 0.3339  |
| 11 N  | -6.0466  | 1.6572  | 0.0313  |
| 12 H  | -5.8800  | 2.6508  | -0.0109 |
| 13 H  | -4.4918  | 0.0834  | -2.4495 |
| 14 H  | -5.9146  | -0.5220 | -1.9224 |
| 15 Cl | -6.8430  | -1.8733 | -1.3183 |
| 16 O  | -3.5012  | 2.5897  | -0.4265 |
| 17 C  | -2.1696  | 2.7700  | -0.3201 |
| 18 C  | -1.5147  | 1.6028  | -0.0773 |
| 19 H  | -0.4552  | 1.4821  | 0.0522  |
| 20 C  | -3.7126  | 1.2558  | -0.2417 |
| 21 C  | -2.5291  | 0.6098  | -0.0270 |
| 22 H  | -2.4046  | -0.4431 | 0.1555  |
| 23 C  | -5.0862  | 0.7822  | -0.2924 |
| 24 H  | -5.2538  | -0.2317 | 0.0467  |
| 25 O  | -5.3249  | 0.3661  | -2.0462 |
| 26 N  | -1.6798  | 4.1081  | -0.4699 |
| 27 O  | -2.4958  | 4.9940  | -0.6708 |
| 28 O  | -0.4673  | 4.2475  | -0.3814 |

NF-BM-TS1

Energy (POTENTIAL) = -1441.15792398 Eh

Gibbs energy= 1411.017877 Eh

Three lowest frequencies (cm<sup>-1</sup>): -522.2677, 27.8982, 40.3578

|    | Atom | X       | Y       | Z       |
|----|------|---------|---------|---------|
| 1  | C    | 1.2458  | -0.5751 | 1.7685  |
| 2  | C    | 3.2780  | 0.2931  | 1.0902  |
| 3  | C    | 2.8451  | -0.7561 | 0.0677  |
| 4  | H    | 2.6259  | -0.2712 | -0.8855 |
| 5  | H    | 3.6264  | -1.4985 | -0.0865 |
| 6  | N    | 2.2872  | 0.3064  | 2.0474  |
| 7  | H    | 2.2459  | 0.9636  | 2.8102  |
| 8  | O    | 4.2740  | 0.9668  | 1.0641  |
| 9  | O    | 0.1879  | -0.6785 | 2.3507  |
| 10 | N    | 1.6575  | -1.3164 | 0.6872  |
| 11 | N    | 0.6782  | -1.9642 | -0.0824 |
| 12 | H    | 1.1023  | -2.7164 | -0.6263 |
| 13 | H    | -0.2754 | -2.5207 | -2.7549 |
| 14 | H    | -0.0056 | -2.3524 | 0.5625  |
| 15 | Cl   | 1.0393  | -3.3004 | -3.1207 |
| 16 | O    | -0.5748 | 0.9183  | -0.1351 |
| 17 | C    | -1.4035 | 1.4749  | 0.7610  |
| 18 | C    | -2.6447 | 0.9097  | 0.7384  |
| 19 | H    | -3.4776 | 1.1819  | 1.3595  |
| 20 | C    | -1.2957 | -0.0708 | -0.7438 |
| 21 | C    | -2.5720 | -0.1043 | -0.2444 |
| 22 | H    | -3.3471 | -0.7860 | -0.5452 |
| 23 | C    | -0.5718 | -0.8984 | -1.6690 |
| 24 | H    | 0.3854  | -0.5334 | -2.0307 |
| 25 | O    | -1.1341 | -1.8708 | -2.2347 |
| 26 | N    | -0.8621 | 2.5005  | 1.5991  |
| 27 | O    | 0.3255  | 2.7680  | 1.4789  |
| 28 | O    | -1.6416 | 3.0241  | 2.3828  |



NF-BM-PA

Energy (POTENTIAL) = -1441.17255480 Eh

Gibbs energy= -1441.038165 Eh

Three lowest frequencies (cm<sup>-1</sup>): 13.4102, 23.3723, 36.0540

|    | Atom | X        | Y       | Z       |
|----|------|----------|---------|---------|
| 1  | C    | -7.7284  | -0.2186 | -0.4211 |
| 2  | C    | -9.2071  | 0.2852  | 1.2985  |
| 3  | C    | -7.9243  | 1.0574  | 1.5482  |
| 4  | H    | -8.1107  | 2.1307  | 1.5224  |
| 5  | H    | -7.4969  | 0.7963  | 2.5153  |
| 6  | N    | -8.9900  | -0.4180 | 0.1305  |
| 7  | H    | -9.6719  | -1.0186 | -0.3066 |
| 8  | O    | -10.2067 | 0.2780  | 1.9673  |
| 9  | O    | -7.3287  | -0.6996 | -1.4602 |
| 10 | N    | -7.0688  | 0.6311  | 0.4472  |
| 11 | N    | -5.8660  | 1.2420  | 0.2843  |
| 12 | H    | -5.8557  | 2.9898  | 0.8929  |
| 13 | H    | -4.8459  | -2.1706 | -3.0772 |
| 14 | H    | -5.9072  | -1.1029 | -2.8288 |
| 15 | Cl   | -6.1356  | 4.2317  | 1.2380  |
| 16 | O    | -3.3759  | 2.4768  | 0.0128  |
| 17 | C    | -2.1668  | 2.8613  | -0.4417 |
| 18 | C    | -1.7497  | 2.1023  | -1.4955 |
| 19 | H    | -0.8244  | 2.2147  | -2.0292 |
| 20 | C    | -3.7565  | 1.4315  | -0.7741 |
| 21 | C    | -2.7877  | 1.1661  | -1.7120 |
| 22 | H    | -2.8505  | 0.3983  | -2.4634 |
| 23 | C    | -5.0181  | 0.7874  | -0.5678 |
| 24 | H    | -5.1879  | -0.0835 | -1.1826 |
| 25 | O    | -4.9971  | -1.2223 | -3.1331 |
| 26 | N    | -1.5289  | 3.9477  | 0.2286  |
| 27 | O    | -2.1014  | 4.4526  | 1.1829  |
| 28 | O    | -0.4362  | 4.2885  | -0.2165 |

DT-BM-Comp

Energy (POTENTIAL) = -1786.21147316 Eh

Gibbs energy= -1786.041870 Eh

Three lowest frequencies ( $\text{cm}^{-1}$ ): 14.2537, 22.7744, 24.1040

|    | Atom | X       | Y       | Z       |
|----|------|---------|---------|---------|
| 1  | H    | 1.7698  | -1.0601 | 1.3533  |
| 2  | Cl   | 3.4506  | -0.0289 | 1.2036  |
| 3  | C    | -1.4278 | -1.0861 | 0.9755  |
| 4  | C    | -1.4583 | 0.2433  | -0.9174 |
| 5  | C    | 0.0016  | -0.0514 | -0.5905 |
| 6  | H    | 0.4201  | -0.7199 | -1.3464 |
| 7  | H    | 0.5881  | 0.8619  | -0.5322 |
| 8  | N    | -2.2044 | -0.4118 | 0.0491  |
| 9  | H    | -3.2122 | -0.4216 | 0.0746  |
| 10 | O    | -1.8846 | 0.9020  | -1.8266 |
| 11 | O    | -1.7746 | -1.8369 | 1.8544  |
| 12 | N    | -0.1186 | -0.7125 | 0.7044  |
| 13 | N    | 0.8831  | -1.6071 | 1.1478  |
| 14 | H    | 0.5206  | -2.0685 | 1.9857  |
| 15 | H    | 1.1098  | -2.3221 | 0.3904  |
| 16 | C    | 6.4699  | -2.1875 | -1.0608 |
| 17 | C    | 6.5005  | -3.5171 | 0.8319  |
| 18 | C    | 5.0405  | -3.2226 | 0.5051  |
| 19 | H    | 4.4541  | -4.1360 | 0.4466  |
| 20 | H    | 4.6219  | -2.5542 | 1.2611  |
| 21 | N    | 7.2465  | -2.8618 | -0.1344 |
| 22 | H    | 8.2543  | -2.8519 | -0.1599 |
| 23 | O    | 6.9268  | -4.1759 | 1.7410  |
| 24 | O    | 6.8166  | -1.4365 | -1.9396 |
| 25 | N    | 5.1607  | -2.5613 | -0.7898 |
| 26 | N    | 4.1589  | -1.6667 | -1.2331 |
| 27 | H    | 3.9322  | -0.9518 | -0.4756 |
| 28 | H    | 4.5212  | -1.2053 | -2.0710 |
| 29 | Cl   | 1.5914  | -3.2449 | -1.2888 |
| 30 | H    | 3.2722  | -2.2138 | -1.4384 |

DT-BM-RA1

Energy (POTENTIAL) = -893.083780922 Eh

Gibbs energy= -893.011972 Eh

Three lowest frequencies ( $\text{cm}^{-1}$ ): 33.1188, 67.2368, 139.3974

|    | Atom | X       | Y       | Z       |
|----|------|---------|---------|---------|
| 1  | C    | -0.9729 | -1.1958 | -0.1883 |
| 2  | C    | -1.7175 | 0.9848  | -0.0056 |
| 3  | C    | -0.4299 | 0.8715  | 0.8013  |
| 4  | H    | 0.3731  | 1.4313  | 0.3171  |
| 5  | H    | -0.5759 | 1.2402  | 1.8142  |
| 6  | N    | -1.9392 | -0.2721 | -0.5445 |
| 7  | H    | -2.7010 | -0.4950 | -1.1659 |
| 8  | O    | -2.4060 | 1.9581  | -0.1524 |
| 9  | O    | -0.8100 | -2.3189 | -0.6033 |
| 10 | N    | -0.1836 | -0.5698 | 0.7659  |
| 11 | N    | 1.1272  | -1.0869 | 0.8994  |
| 12 | H    | 1.3191  | -1.3003 | 1.8759  |
| 13 | H    | 1.1461  | -1.9618 | 0.3664  |
| 14 | H    | 1.9491  | -0.3189 | 0.4354  |
| 15 | Cl   | 2.9325  | 0.7835  | -0.2434 |

DT-BM-RA2

Energy (POTENTIAL) = -1672.35041598 Eh

Gibbs energy= -1672.135411 Eh

Three lowest frequencies (cm<sup>-1</sup>): 11.2986, 18.6346, 23.0312

|    | Atom | X       | Y       | Z       |
|----|------|---------|---------|---------|
| 1  | C    | -2.7994 | -1.1607 | -0.6035 |
| 2  | C    | -5.0484 | -0.6155 | -0.5211 |
| 3  | C    | -4.4542 | -0.3331 | 0.8510  |
| 4  | H    | -4.3971 | 0.7480  | 1.0017  |
| 5  | H    | -5.0439 | -0.7994 | 1.6369  |
| 6  | N    | -4.0005 | -1.0827 | -1.2909 |
| 7  | H    | -4.0747 | -1.3082 | -2.2706 |
| 8  | O    | -6.1880 | -0.4644 | -0.8718 |
| 9  | O    | -1.7066 | -1.4060 | -1.0454 |
| 10 | N    | -3.1181 | -0.9219 | 0.7354  |
| 11 | N    | -2.0774 | -0.3669 | 1.5221  |
| 12 | H    | -2.1996 | -0.6462 | 2.4926  |
| 13 | H    | -1.1259 | -0.6951 | 1.2003  |
| 14 | H    | -2.0799 | 0.7313  | 1.3859  |
| 15 | Cl   | -2.1968 | 2.3986  | 0.6836  |
| 16 | O    | 3.2135  | -0.1574 | 0.2113  |
| 17 | C    | 4.3365  | 0.3525  | -0.3497 |
| 18 | C    | 4.0079  | 1.4066  | -1.1738 |
| 19 | H    | 4.6905  | 2.0036  | -1.7510 |
| 20 | C    | 2.1543  | 0.5712  | -0.2527 |
| 21 | C    | 2.6076  | 1.5451  | -1.1095 |
| 22 | H    | 1.9940  | 2.2676  | -1.6192 |
| 23 | C    | 0.8273  | 0.2603  | 0.1827  |
| 24 | H    | 0.0471  | 0.9070  | -0.2412 |
| 25 | O    | 0.5496  | -0.6371 | 0.9757  |
| 26 | C    | 5.5977  | -0.2675 | 0.0007  |
| 27 | C    | 5.6331  | -1.3657 | 0.8707  |
| 28 | C    | 6.7974  | 0.2282  | -0.5281 |
| 29 | C    | 6.8377  | -1.9558 | 1.2048  |
| 30 | H    | 4.7127  | -1.7513 | 1.2807  |
| 31 | C    | 8.0045  | -0.3564 | -0.1991 |
| 32 | H    | 6.7857  | 1.0751  | -1.1976 |
| 33 | C    | 8.0086  | -1.4433 | 0.6650  |
| 34 | H    | 6.8813  | -2.8010 | 1.8724  |
| 35 | H    | 8.9348  | 0.0142  | -0.5978 |
| 36 | N    | 9.2906  | -2.0674 | 1.0180  |

|      |         |         |        |
|------|---------|---------|--------|
| 37 0 | 10.3082 | -1.5975 | 0.5276 |
| 38 0 | 9.2697  | -3.0220 | 1.7825 |

DT-BM-TS1

Energy (POTENTIAL) = -1672.33928354 Eh

Gibbs energy= -1672.121304 Eh

Three lowest frequencies (cm<sup>-1</sup>): -47.9133, 19.1509, 24.0777

| Atom  | X       | Y       | Z       |
|-------|---------|---------|---------|
| 1 C   | 1.0390  | -0.9052 | 1.8641  |
| 2 C   | 2.7929  | 0.5229  | 1.3813  |
| 3 C   | 2.6293  | -0.4461 | 0.2141  |
| 4 H   | 2.2925  | 0.0978  | -0.6699 |
| 5 H   | 3.5703  | -0.9431 | -0.0158 |
| 6 N   | 1.8362  | 0.1565  | 2.2993  |
| 7 H   | 1.6757  | 0.6305  | 3.1737  |
| 8 O   | 3.5806  | 1.4293  | 1.4749  |
| 9 O   | 0.0314  | -1.3252 | 2.3873  |
| 10 N  | 1.6173  | -1.3650 | 0.7070  |
| 11 N  | 0.7944  | -2.0594 | -0.1983 |
| 12 H  | 1.3458  | -2.6841 | -0.7881 |
| 13 H  | -0.3719 | -2.4691 | -2.8034 |
| 14 H  | 0.1375  | -2.6057 | 0.3527  |
| 15 Cl | 1.1202  | -3.2081 | -3.2667 |
| 16 O  | -0.5168 | 0.8908  | -0.1929 |
| 17 C  | -1.2963 | 1.4665  | 0.7573  |
| 18 C  | -2.5273 | 0.8487  | 0.7781  |
| 19 H  | -3.3534 | 1.0995  | 1.4183  |
| 20 C  | -1.2497 | -0.1164 | -0.7713 |
| 21 C  | -2.4948 | -0.1659 | -0.1962 |
| 22 H  | -3.2758 | -0.8600 | -0.4507 |
| 23 C  | -0.5644 | -0.9279 | -1.7086 |
| 24 H  | 0.3867  | -0.5871 | -2.0998 |
| 25 O  | -1.1408 | -1.9151 | -2.2681 |
| 26 C  | 0.3944  | 4.5620  | 3.0556  |
| 27 C  | -0.8189 | 4.0128  | 3.4484  |
| 28 C  | -1.3714 | 3.0025  | 2.6855  |
| 29 C  | -0.7184 | 2.5435  | 1.5334  |
| 30 C  | 0.5010  | 3.1226  | 1.1588  |
| 31 C  | 1.0636  | 4.1297  | 1.9200  |
| 32 N  | 0.9879  | 5.6326  | 3.8704  |
| 33 H  | -1.3059 | 4.3732  | 4.3399  |
| 34 H  | -2.3043 | 2.5554  | 2.9940  |
| 35 H  | 1.0085  | 2.7824  | 0.2702  |
| 36 H  | 2.0066  | 4.5750  | 1.6485  |

|      |        |        |        |
|------|--------|--------|--------|
| 37 0 | 2.0447 | 6.1165 | 3.4925 |
| 38 0 | 0.3893 | 5.9776 | 4.8798 |

DT-BM-INT

Energy (POTENTIAL) = -1672.34538350 Eh

Gibbs energy= -1672.130684 Eh

Three lowest frequencies (cm<sup>-1</sup>): 11.1112, 15.1896, 21.8514

|    | Atom | X       | Y       | Z       |
|----|------|---------|---------|---------|
| 1  | C    | 0.6151  | -1.1763 | 1.0979  |
| 2  | H    | 0.3843  | -0.3034 | 1.7199  |
| 3  | O    | 0.5125  | -2.3767 | 1.8226  |
| 4  | H    | -0.4343 | -2.5430 | 1.9764  |
| 5  | C    | -2.1915 | 0.4726  | -0.3869 |
| 6  | C    | -2.4707 | -1.3602 | 1.0433  |
| 7  | C    | -3.6099 | 0.4382  | 0.1515  |
| 8  | H    | -2.1915 | 0.3871  | -1.4742 |
| 9  | H    | -1.6972 | 1.4053  | -0.1145 |
| 10 | N    | -1.5898 | -0.6817 | 0.2560  |
| 11 | O    | -2.2798 | -2.3602 | 1.7064  |
| 12 | O    | -4.5146 | 1.2192  | -0.0750 |
| 13 | N    | -3.6825 | -0.6571 | 0.9607  |
| 14 | H    | -4.5031 | -0.9310 | 1.4793  |
| 15 | N    | -0.2954 | -1.0828 | -0.0463 |
| 16 | H    | -0.2995 | -1.9486 | -0.5771 |
| 17 | H    | -4.0865 | 2.5050  | -1.1144 |
| 18 | Cl   | -3.5961 | 3.4339  | -1.9198 |
| 19 | O    | 2.4002  | 0.0883  | 0.0427  |
| 20 | C    | 3.7114  | -0.0388 | -0.3397 |
| 21 | C    | 4.1499  | -1.2926 | -0.0125 |
| 22 | H    | 5.1340  | -1.6894 | -0.1876 |
| 23 | C    | 2.0211  | -1.0885 | 0.6072  |
| 24 | C    | 3.0567  | -1.9683 | 0.5999  |
| 25 | H    | 3.0340  | -2.9682 | 0.9922  |
| 26 | C    | 5.5367  | 3.2756  | -2.2038 |
| 27 | C    | 4.2014  | 3.3596  | -1.8329 |
| 28 | C    | 3.6044  | 2.2738  | -1.2217 |
| 29 | C    | 4.3325  | 1.0998  | -0.9764 |
| 30 | C    | 5.6810  | 1.0463  | -1.3631 |
| 31 | C    | 6.2842  | 2.1261  | -1.9743 |
| 32 | N    | 6.1725  | 4.4225  | -2.8512 |
| 33 | H    | 3.6499  | 4.2655  | -2.0263 |
| 34 | H    | 2.5667  | 2.3262  | -0.9313 |
| 35 | H    | 6.2587  | 0.1523  | -1.1810 |
| 36 | H    | 7.3190  | 2.0940  | -2.2741 |



|      |        |        |         |
|------|--------|--------|---------|
| 37 0 | 7.3525 | 4.3231 | -3.1666 |
| 38 0 | 5.4931 | 5.4234 | -3.0449 |

DT-BM-TS2

Energy (POTENTIAL) = -1672.32716685 Eh

Gibbs energy= -1672.111424 Eh

Three lowest frequencies (cm<sup>-1</sup>): -301.5212, 18.9733, 21.9891

| Atom  | X        | Y       | Z       |
|-------|----------|---------|---------|
| 1 C   | -7.5036  | 0.2793  | 1.4722  |
| 2 C   | -9.4290  | 0.3558  | 0.1791  |
| 3 C   | -8.3863  | 1.2279  | -0.5064 |
| 4 H   | -8.1235  | 0.7798  | -1.4635 |
| 5 H   | -8.7653  | 2.2386  | -0.6520 |
| 6 N   | -8.8203  | -0.1414 | 1.3112  |
| 7 H   | -9.2455  | -0.8132 | 1.9300  |
| 8 O   | -10.5582 | 0.1475  | -0.1826 |
| 9 O   | -6.7220  | -0.0685 | 2.3221  |
| 10 N  | -7.2821  | 1.1844  | 0.4480  |
| 11 N  | -6.0103  | 1.6070  | 0.1694  |
| 12 H  | -5.8372  | 2.5973  | 0.2192  |
| 13 H  | -4.5963  | 0.2845  | -2.4645 |
| 14 H  | -6.0355  | -0.3925 | -1.9726 |
| 15 Cl | -6.9606  | -1.7525 | -1.6085 |
| 16 O  | -3.4801  | 2.5757  | -0.4420 |
| 17 C  | -2.1310  | 2.7867  | -0.3532 |
| 18 C  | -1.5021  | 1.5898  | -0.1362 |
| 19 H  | -0.4442  | 1.4348  | -0.0258 |
| 20 C  | -3.6958  | 1.2381  | -0.2759 |
| 21 C  | -2.5119  | 0.5928  | -0.0890 |
| 22 H  | -2.3834  | -0.4631 | 0.0726  |
| 23 C  | -5.0694  | 0.7632  | -0.3194 |
| 24 H  | -5.2015  | -0.2672 | -0.0158 |
| 25 O  | -5.4153  | 0.5222  | -2.0059 |
| 26 C  | -0.7290  | 6.7339  | -0.8203 |
| 27 C  | -2.0815  | 6.4771  | -0.9903 |
| 28 C  | -2.5415  | 5.1827  | -0.8347 |
| 29 C  | -1.6564  | 4.1461  | -0.5097 |
| 30 C  | -0.2953  | 4.4379  | -0.3422 |
| 31 C  | 0.1720   | 5.7279  | -0.4970 |
| 32 N  | -0.2362  | 8.1067  | -0.9868 |
| 33 H  | -2.7513  | 7.2832  | -1.2421 |
| 34 H  | -3.5902  | 4.9692  | -0.9709 |
| 35 H  | 0.3995   | 3.6528  | -0.0845 |
| 36 H  | 1.2158   | 5.9651  | -0.3700 |

|    |   |         |        |         |
|----|---|---------|--------|---------|
| 37 | 0 | 0.9607  | 8.3062 | -0.8305 |
| 38 | 0 | -1.0494 | 8.9747 | -1.2730 |

NF-BM-R1

Energy (POTENTIAL) = -432.226528694 Eh

Gibbs energy= -432.161728 Eh

Three lowest frequencies (cm<sup>-1</sup>): 48.0439, 140.0751, 189.5314

|    | Atom | X       | Y       | Z       |
|----|------|---------|---------|---------|
| 1  | C    | -0.6665 | 0.8014  | -0.0196 |
| 2  | C    | 1.4864  | -0.0687 | 0.0072  |
| 3  | C    | 0.5013  | -1.2319 | 0.0128  |
| 4  | H    | 0.6772  | -1.8836 | -0.8439 |
| 5  | H    | 0.6159  | -1.8187 | 0.9261  |
| 6  | N    | 0.7140  | 1.0674  | -0.0098 |
| 7  | H    | 1.0824  | 2.0050  | -0.0119 |
| 8  | O    | 2.6923  | -0.1270 | 0.0160  |
| 9  | O    | -1.5560 | 1.6222  | 0.0008  |
| 10 | N    | -1.9852 | -1.2496 | 0.0556  |
| 11 | H    | -2.4933 | -0.9105 | 0.8661  |
| 12 | H    | -2.5524 | -1.0574 | -0.7628 |
| 13 | N    | -0.7791 | -0.5586 | -0.0527 |

NF-BM-R3\_P3

Energy (POTENTIAL) = -460.845013373 Eh

Gibbs energy= -460.856223 Eh

Vibrational frequency (cm<sup>-1</sup>): 2930.5214

|   | Atom | X       | Y       | Z       |
|---|------|---------|---------|---------|
| 1 | Cl   | 0.9854  | -0.8681 | 0.2351  |
| 2 | H    | -0.2584 | -0.6479 | -0.0011 |

NF-BM-P1

Energy (POTENTIAL) = -76.4636072122 Eh

Gibbs energy= -76.460014 Eh

Three lowest frequencies ( $\text{cm}^{-1}$ ): 1634.9965, 3796.9517, 3890.5583

|   | Atom | X      | Y       | Z       |
|---|------|--------|---------|---------|
| 1 | O    | 0.0000 | 0.0000  | 0.1117  |
| 2 | H    | 0.0000 | 0.7596  | -0.4783 |
| 3 | H    | 0.0000 | -0.7596 | -0.4783 |

NF-BM-R2

Energy (POTENTIAL) = -779.247746017 Eh

Gibbs energy= -779.126090 Eh

Three lowest frequencies (cm<sup>-1</sup>): 30.7386, 56.6186, 58.8878

| Atom | X       | Y       | Z       |
|------|---------|---------|---------|
| 1 O  | -0.5030 | -0.8511 | 0.6343  |
| 2 C  | -1.4977 | -1.0394 | -0.2701 |
| 3 C  | -1.5339 | 0.0221  | -1.1441 |
| 4 H  | -2.2145 | 0.1512  | -1.9661 |
| 5 C  | 0.1029  | 0.3355  | 0.3419  |
| 6 C  | -0.5046 | 0.9040  | -0.7484 |
| 7 H  | -0.2362 | 1.8423  | -1.2023 |
| 8 C  | 1.2100  | 0.7868  | 1.1559  |
| 9 H  | 1.6213  | 1.7584  | 0.8275  |
| 10 O | 1.6669  | 0.1876  | 2.1077  |
| 11 C | -2.2848 | -2.2491 | -0.1509 |
| 12 C | -3.3268 | -2.5060 | -1.0529 |
| 13 C | -2.0149 | -3.1759 | 0.8656  |
| 14 C | -4.0818 | -3.6570 | -0.9455 |
| 15 H | -3.5468 | -1.8023 | -1.8417 |
| 16 C | -2.7663 | -4.3305 | 0.9792  |
| 17 H | -1.2143 | -2.9840 | 1.5629  |
| 18 C | -3.7914 | -4.5571 | 0.0717  |
| 19 H | -4.8856 | -3.8670 | -1.6321 |
| 20 H | -2.5701 | -5.0519 | 1.7558  |
| 21 N | -4.5918 | -5.7815 | 0.1883  |
| 22 O | -5.4916 | -5.9555 | -0.6231 |
| 23 O | -4.3160 | -6.5617 | 1.0896  |

NF-BM-P2

Energy (POTENTIAL) = -1135.01737740 Eh

Gibbs energy= -1134.832228 Eh

Three lowest frequencies (cm<sup>-1</sup>): 23.5288, 28.6176, 30.7268

|    | Atom | X        | Y       | Z       |
|----|------|----------|---------|---------|
| 1  | C    | -7.5207  | -0.6693 | -0.0733 |
| 2  | C    | -9.1896  | 0.1935  | 1.2987  |
| 3  | C    | -8.0380  | 1.1843  | 1.2782  |
| 4  | H    | -8.3661  | 2.1461  | 0.8842  |
| 5  | H    | -7.6395  | 1.3319  | 2.2817  |
| 6  | N    | -8.7930  | -0.8429 | 0.4859  |
| 7  | H    | -9.3489  | -1.6623 | 0.2963  |
| 8  | O    | -10.2322 | 0.2876  | 1.8965  |
| 9  | O    | -6.9631  | -1.4454 | -0.8160 |
| 10 | N    | -7.0693  | 0.5457  | 0.4022  |
| 11 | N    | -5.8979  | 1.1886  | 0.1735  |
| 12 | O    | -3.5331  | 2.5599  | -0.2434 |
| 13 | C    | -2.2945  | 2.9799  | -0.6387 |
| 14 | C    | -1.7444  | 2.0427  | -1.4765 |
| 15 | H    | -0.7784  | 2.0951  | -1.9457 |
| 16 | C    | -3.7707  | 1.3541  | -0.8308 |
| 17 | C    | -2.6914  | 0.9991  | -1.5998 |
| 18 | H    | -2.5996  | 0.0967  | -2.1786 |
| 19 | C    | -5.0066  | 0.6684  | -0.5942 |
| 20 | H    | -5.1299  | -0.2849 | -1.0913 |
| 21 | C    | -1.8305  | 4.2492  | -0.1301 |
| 22 | C    | -0.5715  | 4.7455  | -0.5034 |
| 23 | C    | -2.6274  | 5.0054  | 0.7430  |
| 24 | C    | -0.1200  | 5.9570  | -0.0220 |
| 25 | H    | 0.0551   | 4.1779  | -1.1752 |
| 26 | C    | -2.1817  | 6.2194  | 1.2291  |
| 27 | H    | -3.5965  | 4.6319  | 1.0353  |
| 28 | C    | -0.9317  | 6.6835  | 0.8417  |
| 29 | H    | 0.8448   | 6.3473  | -0.3024 |
| 30 | H    | -2.7851  | 6.8087  | 1.9004  |
| 31 | N    | -0.4564  | 7.9690  | 1.3542  |
| 32 | O    | -1.1883  | 8.5904  | 2.1149  |
| 33 | O    | 0.6492   | 8.3567  | 0.9957  |



DT-BM-PA

Energy (POTENTIAL) = -1672.35262982 Eh

Gibbs energy= -1672.143735 Eh

Three lowest frequencies (cm<sup>-1</sup>): 14.7358, 22.0651, 26.8770

| Atom  | X        | Y       | Z       |
|-------|----------|---------|---------|
| 1 C   | -7.7247  | 0.2560  | -0.5662 |
| 2 C   | -9.0929  | 0.4444  | 1.2984  |
| 3 C   | -7.6940  | 0.8832  | 1.6965  |
| 4 H   | -7.6884  | 1.9407  | 1.9630  |
| 5 H   | -7.3321  | 0.3031  | 2.5439  |
| 6 N   | -9.0035  | 0.1067  | -0.0358 |
| 7 H   | -9.7797  | -0.2082 | -0.5965 |
| 8 O   | -10.0763 | 0.3948  | 1.9906  |
| 9 O   | -7.4200  | 0.0965  | -1.7302 |
| 10 N  | -6.9186  | 0.6268  | 0.4898  |
| 11 N  | -5.6727  | 1.2035  | 0.3676  |
| 12 H  | -5.5306  | 2.6798  | 1.1117  |
| 13 H  | -5.4661  | -2.1214 | -3.1539 |
| 14 H  | -6.0470  | -0.7477 | -2.8124 |
| 15 Cl | -5.5983  | 3.8822  | 1.7422  |
| 16 O  | -3.1310  | 2.3283  | -0.0851 |
| 17 C  | -1.8889  | 2.6242  | -0.5591 |
| 18 C  | -1.5336  | 1.7034  | -1.5167 |
| 19 H  | -0.6138  | 1.6851  | -2.0727 |
| 20 C  | -3.5676  | 1.2149  | -0.7405 |
| 21 C  | -2.6118  | 0.7994  | -1.6342 |
| 22 H  | -2.7096  | -0.0416 | -2.2984 |
| 23 C  | -4.8516  | 0.6684  | -0.4688 |
| 24 H  | -5.0899  | -0.2279 | -1.0264 |
| 25 O  | -5.2186  | -1.2003 | -3.0319 |
| 26 C  | -1.2251  | 3.7827  | -0.0032 |
| 27 C  | -1.8728  | 4.5894  | 0.9435  |
| 28 C  | 0.0760   | 4.1124  | -0.4108 |
| 29 C  | -1.2357  | 5.6976  | 1.4698  |
| 30 H  | -2.8765  | 4.3476  | 1.2585  |
| 31 C  | 0.7168   | 5.2182  | 0.1105  |
| 32 H  | 0.5881   | 3.4991  | -1.1371 |
| 33 C  | 0.0515   | 5.9992  | 1.0475  |
| 34 H  | -1.7223  | 6.3275  | 2.1968  |
| 35 H  | 1.7164   | 5.4828  | -0.1935 |
| 36 N  | 0.7298   | 7.1745  | 1.6036  |

|      |        |        |        |
|------|--------|--------|--------|
| 37 0 | 1.8629 | 7.4211 | 1.2102 |
| 38 0 | 0.1275 | 7.8457 | 2.4309 |

NF-SOL-R1

Energy (POTENTIAL) = -432.233833872 Eh

Gibbs energy= -432.169127 Eh

Three lowest frequencies (cm<sup>-1</sup>): 43.9816, 148.1338, 194.0461

|    | Atom | X       | Y       | Z       |
|----|------|---------|---------|---------|
| 1  | C    | -0.6643 | 0.8004  | -0.0082 |
| 2  | C    | 1.4835  | -0.0680 | 0.0050  |
| 3  | C    | 0.5008  | -1.2294 | 0.0310  |
| 4  | H    | 0.6451  | -1.8681 | -0.8415 |
| 5  | H    | 0.6445  | -1.8271 | 0.9324  |
| 6  | N    | 0.7159  | 1.0666  | -0.0161 |
| 7  | H    | 1.0852  | 2.0043  | -0.0353 |
| 8  | O    | 2.6929  | -0.1272 | 0.0034  |
| 9  | O    | -1.5518 | 1.6286  | -0.0203 |
| 10 | N    | -1.9861 | -1.2510 | 0.0416  |
| 11 | H    | -2.5181 | -0.9706 | 0.8587  |
| 12 | H    | -2.5291 | -1.0127 | -0.7814 |
| 13 | N    | -0.7798 | -0.5543 | 0.0153  |

NF-SOL-R3\_P3

Energy (POTENTIAL) = -229.195108211 Eh

Gibbs energy= -229.160908 Eh

Three lowest frequencies (cm<sup>-1</sup>): 74.6242, 430.0155, 544.9171

|   | Atom | X       | Y       | Z      |
|---|------|---------|---------|--------|
| 1 | C    | -2.0479 | 0.9209  | 1.1825 |
| 2 | H    | -2.8202 | 1.4202  | 1.7578 |
| 3 | H    | -2.1143 | -0.1574 | 1.3260 |
| 4 | H    | -2.1883 | 1.1179  | 0.1199 |
| 5 | O    | 0.2951  | 0.8082  | 0.9216 |
| 6 | C    | -0.6969 | 1.4064  | 1.6130 |
| 7 | O    | -0.4813 | 2.2310  | 2.4701 |
| 8 | H    | 1.1376  | 1.1631  | 1.2444 |

NF-SOL-R2

Energy (POTENTIAL) = -548.076160296 Eh

Gibbs energy= -548.028210 Eh

Three lowest frequencies ( $\text{cm}^{-1}$ ): 65.6273, 135.3598, 139.1407

|    | Atom | X       | Y       | Z       |
|----|------|---------|---------|---------|
| 1  | O    | -0.3562 | -0.4896 | -0.0000 |
| 2  | C    | 0.7538  | 0.2637  | 0.0000  |
| 3  | C    | 0.4805  | 1.6002  | 0.0000  |
| 4  | H    | 1.1965  | 2.4007  | 0.0001  |
| 5  | C    | -1.3995 | 0.3903  | 0.0000  |
| 6  | C    | -0.9315 | 1.6800  | 0.0000  |
| 7  | H    | -1.5340 | 2.5712  | 0.0001  |
| 8  | C    | -2.7574 | -0.1324 | -0.0000 |
| 9  | H    | -3.5290 | 0.6535  | -0.0000 |
| 10 | O    | -3.0342 | -1.3128 | -0.0000 |
| 11 | N    | 2.0070  | -0.4237 | 0.0000  |
| 12 | O    | 1.9940  | -1.6467 | -0.0000 |
| 13 | O    | 3.0124  | 0.2780  | 0.0000  |

NF-SOL-P1

Energy (POTENTIAL) = -76.4670027177 Eh

Gibbs energy= -76.463456 Eh

Three lowest frequencies ( $\text{cm}^{-1}$ ): 1631.3574, 3792.7827, 3879.0725

|   | Atom | X      | Y       | Z       |
|---|------|--------|---------|---------|
| 1 | O    | 0.0000 | 0.0000  | 0.1132  |
| 2 | H    | 0.0000 | 0.7585  | -0.4791 |
| 3 | H    | 0.0000 | -0.7585 | -0.4791 |

NF-SOL-P2

Energy (POTENTIAL) = -903.852683385 Eh

Gibbs energy= -903.742330 Eh

Three lowest frequencies (cm<sup>-1</sup>): 13.3671, 38.1957, 53.3690

|    | Atom | X        | Y       | Z       |
|----|------|----------|---------|---------|
| 1  | C    | -7.7347  | -0.3038 | -0.3969 |
| 2  | C    | -9.2115  | 0.3715  | 1.2607  |
| 3  | C    | -7.9588  | 1.2178  | 1.3869  |
| 4  | H    | -8.1919  | 2.2734  | 1.2536  |
| 5  | H    | -7.4944  | 1.0731  | 2.3617  |
| 6  | N    | -8.9823  | -0.4754 | 0.2032  |
| 7  | H    | -9.6408  | -1.1649 | -0.1265 |
| 8  | O    | -10.2069 | 0.4235  | 1.9422  |
| 9  | O    | -7.3045  | -0.9275 | -1.3405 |
| 10 | N    | -7.1168  | 0.7141  | 0.3116  |
| 11 | N    | -5.9024  | 1.2652  | 0.1388  |
| 12 | O    | -3.4531  | 2.4805  | -0.1011 |
| 13 | C    | -2.2121  | 2.8513  | -0.4861 |
| 14 | C    | -1.7701  | 2.1204  | -1.5516 |
| 15 | H    | -0.8204  | 2.2213  | -2.0432 |
| 16 | C    | -3.8267  | 1.4781  | -0.9439 |
| 17 | C    | -2.8209  | 1.2266  | -1.8497 |
| 18 | H    | -2.8461  | 0.4869  | -2.6299 |
| 19 | C    | -5.1148  | 0.8621  | -0.7939 |
| 20 | H    | -5.3562  | 0.0730  | -1.4924 |
| 21 | N    | -1.5908  | 3.8931  | 0.2408  |
| 22 | O    | -2.2061  | 4.4028  | 1.1740  |
| 23 | O    | -0.4594  | 4.2216  | -0.1179 |

NF-SOL-Comp

Energy (POTENTIAL) = -661.449801069 Eh

Gibbs energy= -661.331956 Eh

Three lowest frequencies (cm<sup>-1</sup>): 27.8007, 57.3154, 60.2640

|    | Atom | X       | Y       | Z       |
|----|------|---------|---------|---------|
| 1  | N    | -0.0575 | 0.3985  | -1.6366 |
| 2  | H    | -0.9810 | 0.5077  | -2.0415 |
| 3  | H    | -0.1358 | 0.5249  | -0.6333 |
| 4  | N    | 0.4146  | -0.8848 | -1.9043 |
| 5  | C    | 1.6409  | -1.1252 | -2.6394 |
| 6  | C    | 1.7079  | -2.6470 | -2.6672 |
| 7  | N    | 0.5944  | -3.0841 | -1.9963 |
| 8  | C    | -0.1895 | -2.0352 | -1.5342 |
| 9  | H    | 1.5988  | -0.7250 | -3.6528 |
| 10 | O    | 2.5647  | -3.3349 | -3.1752 |
| 11 | O    | -1.2390 | -2.1483 | -0.9045 |
| 12 | H    | 0.3157  | -4.0555 | -1.8213 |
| 13 | H    | 2.5131  | -0.7126 | -2.1314 |
| 14 | H    | -1.8329 | -3.6464 | -0.5374 |
| 15 | O    | -2.2948 | -4.4892 | -0.2604 |
| 16 | C    | -2.3166 | -6.8440 | -0.2552 |
| 17 | C    | -1.6356 | -5.5681 | -0.6535 |
| 18 | O    | -0.5845 | -5.5324 | -1.2760 |
| 19 | H    | -2.4362 | -6.8731 | 0.8276  |
| 20 | H    | -3.3139 | -6.8772 | -0.6937 |
| 21 | H    | -1.7370 | -7.6986 | -0.5880 |



NF-SOL-RA

Energy (POTENTIAL) = -1209.52964459 Eh

Gibbs energy= -1209.345055 Eh

Three lowest frequencies (cm<sup>-1</sup>): 13.3445, 18.7923, 22.4999

|    | Atom | X       | Y       | Z       |
|----|------|---------|---------|---------|
| 1  | C    | -0.7805 | -0.7453 | 1.2603  |
| 2  | H    | -1.6655 | -1.2151 | 0.8226  |
| 3  | O    | 0.2415  | -1.3874 | 1.4531  |
| 4  | N    | -0.1897 | -0.0662 | -1.4552 |
| 5  | H    | 0.5892  | 0.3756  | -0.9718 |
| 6  | H    | -0.4595 | 0.5068  | -2.2480 |
| 7  | C    | -0.9083 | 0.6601  | 1.5952  |
| 8  | O    | -2.0943 | 1.2520  | 1.2598  |
| 9  | C    | -1.9892 | 2.5297  | 1.6482  |
| 10 | C    | -0.7838 | 2.7981  | 2.2319  |
| 11 | C    | -0.0800 | 1.5743  | 2.1972  |
| 12 | N    | -3.1109 | 3.3803  | 1.4047  |
| 13 | O    | -2.9965 | 4.5473  | 1.7632  |
| 14 | O    | -4.0953 | 2.8962  | 0.8636  |
| 15 | H    | 0.9085  | 1.3838  | 2.5735  |
| 16 | H    | -0.4604 | 3.7429  | 2.6273  |
| 17 | N    | 0.2385  | -1.3133 | -1.9021 |
| 18 | C    | 1.4927  | -1.5587 | -2.5941 |
| 19 | C    | 1.4895  | -3.0690 | -2.7606 |
| 20 | N    | 0.3178  | -3.4964 | -2.1983 |
| 21 | C    | -0.4623 | -2.4534 | -1.6641 |
| 22 | H    | 1.5275  | -1.0694 | -3.5693 |
| 23 | O    | 2.3403  | -3.7551 | -3.2829 |
| 24 | O    | -1.5391 | -2.5980 | -1.1220 |
| 25 | H    | 0.0205  | -4.4585 | -2.1614 |
| 26 | H    | 2.3512  | -1.2348 | -2.0053 |
| 27 | H    | 1.8083  | -0.7694 | 1.6503  |
| 28 | O    | 2.7455  | -0.4730 | 1.7874  |
| 29 | C    | 4.5634  | 0.7486  | 0.9133  |
| 30 | C    | 3.1381  | 0.3032  | 0.7793  |
| 31 | O    | 2.4079  | 0.6127  | -0.1446 |
| 32 | H    | 4.7017  | 1.2611  | 1.8650  |
| 33 | H    | 5.2179  | -0.1231 | 0.9150  |
| 34 | H    | 4.8275  | 1.4074  | 0.0930  |

NF-SOL-TS1

Energy (POTENTIAL) = -1209.51823635 Eh

Gibbs energy= -1209.329374 Eh

Three lowest frequencies (cm<sup>-1</sup>): -165.3947, 16.5512, 23.3328

|    | Atom | X       | Y       | Z       |
|----|------|---------|---------|---------|
| 1  | C    | 0.2941  | -1.8635 | -0.7759 |
| 2  | H    | -0.5877 | -2.4738 | -1.0080 |
| 3  | O    | 1.3355  | -2.4491 | -0.3264 |
| 4  | N    | 0.6286  | -1.3610 | -2.4973 |
| 5  | H    | 1.5109  | -0.8142 | -2.4200 |
| 6  | H    | -0.1270 | -0.7992 | -2.8880 |
| 7  | C    | -0.0742 | -0.5440 | -0.1958 |
| 8  | O    | -1.2083 | 0.0477  | -0.6689 |
| 9  | C    | -1.3274 | 1.2156  | 0.0006  |
| 10 | C    | -0.3106 | 1.3927  | 0.8904  |
| 11 | C    | 0.5072  | 0.2419  | 0.7587  |
| 12 | N    | -2.4415 | 2.0353  | -0.3155 |
| 13 | O    | -2.5424 | 3.0918  | 0.3044  |
| 14 | O    | -3.2239 | 1.6469  | -1.1765 |
| 15 | H    | 1.4088  | 0.0179  | 1.2988  |
| 16 | H    | -0.1757 | 2.2335  | 1.5454  |
| 17 | N    | 0.8372  | -2.4499 | -3.3468 |
| 18 | C    | 2.0196  | -3.2962 | -3.2928 |
| 19 | C    | 1.5728  | -4.4916 | -4.1246 |
| 20 | N    | 0.2509  | -4.2688 | -4.4353 |
| 21 | C    | -0.2382 | -3.0669 | -3.9273 |
| 22 | H    | 2.8897  | -2.8161 | -3.7371 |
| 23 | O    | 2.2398  | -5.4450 | -4.4444 |
| 24 | O    | -1.3692 | -2.6363 | -3.9908 |
| 25 | H    | -0.3183 | -4.8959 | -4.9825 |
| 26 | H    | 2.2483  | -3.6090 | -2.2753 |
| 27 | H    | 2.5960  | -1.6626 | -0.2076 |
| 28 | O    | 3.5061  | -1.1797 | -0.0845 |
| 29 | C    | 5.0996  | 0.3538  | -0.8975 |
| 30 | C    | 3.7877  | -0.3557 | -1.0659 |
| 31 | O    | 3.0570  | -0.1648 | -2.0362 |
| 32 | H    | 5.0721  | 0.9531  | 0.0127  |
| 33 | H    | 5.9000  | -0.3764 | -0.7815 |
| 34 | H    | 5.2974  | 0.9916  | -1.7527 |

NF-SOL-INT

Energy (POTENTIAL) = -1209.53951883 Eh

Gibbs energy= -1209.348260 Eh

Three lowest frequencies (cm<sup>-1</sup>): 14.2095, 25.1967, 28.4558

|    | Atom | X       | Y       | Z       |
|----|------|---------|---------|---------|
| 1  | C    | -0.3757 | -0.7939 | 0.6933  |
| 2  | H    | -1.2704 | -1.4141 | 0.6090  |
| 3  | O    | 0.5797  | -1.5321 | 1.3724  |
| 4  | N    | 0.1168  | -0.4427 | -0.6734 |
| 5  | H    | 1.6501  | 0.4757  | -0.5479 |
| 6  | H    | -0.5259 | 0.2066  | -1.1205 |
| 7  | C    | -0.7150 | 0.4847  | 1.3945  |
| 8  | O    | -1.6559 | 1.2723  | 0.8050  |
| 9  | C    | -1.7921 | 2.3557  | 1.6066  |
| 10 | C    | -0.9702 | 2.2828  | 2.6900  |
| 11 | C    | -0.2666 | 1.0581  | 2.5477  |
| 12 | N    | -2.7221 | 3.3470  | 1.2061  |
| 13 | O    | -2.8419 | 4.3227  | 1.9444  |
| 14 | O    | -3.3421 | 3.1760  | 0.1613  |
| 15 | H    | 0.4772  | 0.6543  | 3.2092  |
| 16 | H    | -0.8854 | 3.0100  | 3.4760  |
| 17 | N    | 0.2418  | -1.5662 | -1.4866 |
| 18 | C    | 1.5097  | -2.2026 | -1.7824 |
| 19 | C    | 1.0786  | -3.3728 | -2.6564 |
| 20 | N    | -0.2894 | -3.2915 | -2.7480 |
| 21 | C    | -0.8265 | -2.2104 | -2.0410 |
| 22 | H    | 2.1865  | -1.5474 | -2.3312 |
| 23 | O    | 1.7904  | -4.2053 | -3.1668 |
| 24 | O    | -1.9967 | -1.9046 | -1.9530 |
| 25 | H    | -0.8636 | -3.9334 | -3.2721 |
| 26 | H    | 2.0087  | -2.5653 | -0.8840 |
| 27 | H    | 1.4104  | -1.0046 | 1.4215  |
| 28 | O    | 2.8304  | -0.0183 | 1.4355  |
| 29 | C    | 4.4505  | 1.5728  | 0.6587  |
| 30 | C    | 3.1869  | 0.7737  | 0.5748  |
| 31 | O    | 2.4902  | 1.0163  | -0.5263 |
| 32 | H    | 4.2063  | 2.6351  | 0.6671  |
| 33 | H    | 4.9997  | 1.3123  | 1.5571  |
| 34 | H    | 5.0623  | 1.3866  | -0.2234 |

NF-SOL-PA

Energy (POTENTIAL) = -1209.54287775 Eh

Gibbs energy= -1209.357874 Eh

Three lowest frequencies (cm<sup>-1</sup>): 14.7098, 25.7523, 38.6443

| Atom | X       | Y       | Z       |
|------|---------|---------|---------|
| 1 C  | -1.2354 | -0.6912 | 0.3361  |
| 2 H  | -1.9324 | -1.4982 | 0.5066  |
| 3 O  | 1.9822  | -2.4609 | 0.8110  |
| 4 N  | -0.2754 | -0.7618 | -0.5176 |
| 5 H  | 1.0951  | 0.4395  | -0.6144 |
| 6 C  | -1.4132 | 0.4865  | 1.1333  |
| 7 O  | -0.5710 | 1.5443  | 0.9748  |
| 8 C  | -0.9674 | 2.4776  | 1.8651  |
| 9 C  | -2.0440 | 2.0607  | 2.5941  |
| 10 C | -2.3353 | 0.7641  | 2.1165  |
| 11 N | -0.2300 | 3.6858  | 1.9089  |
| 12 O | -0.5968 | 4.5289  | 2.7255  |
| 13 O | 0.7188  | 3.8178  | 1.1399  |
| 14 H | -3.1190 | 0.1075  | 2.4501  |
| 15 H | -2.5461 | 2.6159  | 3.3644  |
| 16 N | -0.0772 | -1.8779 | -1.2512 |
| 17 C | 1.0498  | -1.9003 | -2.1740 |
| 18 C | 1.1681  | -3.3684 | -2.5289 |
| 19 N | 0.2179  | -4.0112 | -1.7743 |
| 20 C | -0.5162 | -3.1616 | -0.9532 |
| 21 H | 0.8627  | -1.2970 | -3.0603 |
| 22 O | 1.9358  | -3.8764 | -3.3102 |
| 23 O | -1.3598 | -3.4936 | -0.1532 |
| 24 H | 0.0635  | -5.0080 | -1.7817 |
| 25 H | 1.9632  | -1.5704 | -1.6824 |
| 26 H | 2.0633  | -1.5173 | 1.0379  |
| 27 O | 2.4096  | 0.2841  | 1.3136  |
| 28 C | 3.6349  | 2.1412  | 0.4074  |
| 29 C | 2.5899  | 1.0682  | 0.3967  |
| 30 O | 1.8589  | 1.0658  | -0.7135 |
| 31 H | 3.1455  | 3.0875  | 0.6417  |
| 32 H | 4.3824  | 1.9277  | 1.1647  |
| 33 H | 4.0978  | 2.2376  | -0.5725 |
| 34 H | 2.8901  | -2.7681 | 0.7299  |

NF-SOL-TS2

Energy (POTENTIAL) = -1209.51169835 Eh

Gibbs energy= -1209.323125 Eh

Three lowest frequencies ( $\text{cm}^{-1}$ ): -261.6497, 18.0121, 25.3706

|    | Atom | X       | Y       | Z       |
|----|------|---------|---------|---------|
| 1  | C    | -0.3672 | -1.1610 | 0.9650  |
| 2  | H    | -0.8315 | -2.0561 | 1.3530  |
| 3  | O    | 1.2816  | -1.4658 | 1.8528  |
| 4  | N    | -0.1174 | -1.1216 | -0.3437 |
| 5  | H    | 0.5311  | -0.3349 | -0.6943 |
| 6  | C    | -0.7234 | 0.0928  | 1.6118  |
| 7  | O    | -1.0438 | 0.0145  | 2.9320  |
| 8  | C    | -1.3338 | 1.2728  | 3.3145  |
| 9  | C    | -1.2160 | 2.1599  | 2.2862  |
| 10 | C    | -0.8176 | 1.3839  | 1.1708  |
| 11 | N    | -1.7107 | 1.4679  | 4.6736  |
| 12 | O    | -1.9660 | 2.6202  | 5.0098  |
| 13 | O    | -1.7547 | 0.4896  | 5.4087  |
| 14 | H    | -0.6121 | 1.7299  | 0.1743  |
| 15 | H    | -1.3931 | 3.2183  | 2.3299  |
| 16 | N    | -0.0650 | -2.3207 | -1.0342 |
| 17 | C    | -0.8316 | -2.4952 | -2.2601 |
| 18 | C    | -0.1783 | -3.7216 | -2.8770 |
| 19 | N    | 0.8804  | -4.0351 | -2.0515 |
| 20 | C    | 1.0021  | -3.1814 | -0.9663 |
| 21 | H    | -1.8869 | -2.6737 | -2.0619 |
| 22 | O    | -0.5092 | -4.3087 | -3.8765 |
| 23 | O    | 1.8758  | -3.2246 | -0.1179 |
| 24 | H    | 1.5005  | -4.8182 | -2.1926 |
| 25 | H    | -0.7291 | -1.6383 | -2.9271 |
| 26 | H    | 1.8029  | -0.6330 | 1.5065  |
| 27 | O    | 2.5380  | 0.5534  | 1.0048  |
| 28 | C    | 3.3869  | 2.1930  | -0.4841 |
| 29 | C    | 2.4258  | 1.0706  | -0.1424 |
| 30 | O    | 1.5643  | 0.7558  | -1.0110 |
| 31 | H    | 4.3765  | 1.9844  | -0.0825 |
| 32 | H    | 3.4398  | 2.3517  | -1.5581 |
| 33 | H    | 3.0268  | 3.1112  | -0.0156 |
| 34 | H    | 1.6171  | -2.2040 | 1.2939  |
